# Supplementary material
Source: PubMed Central journal article supplement (PMC3229666)

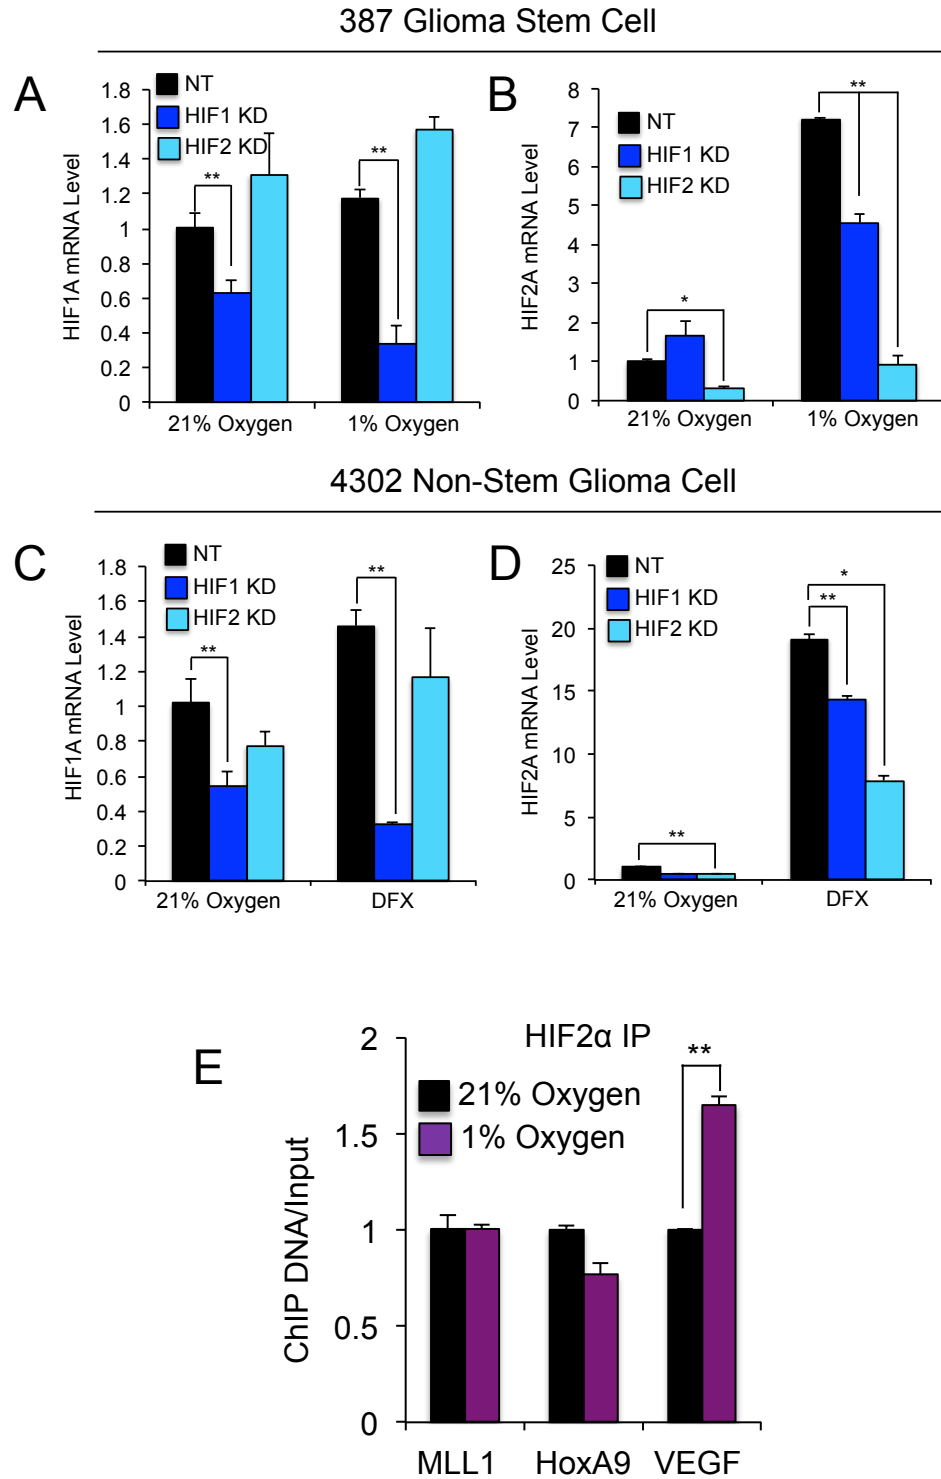

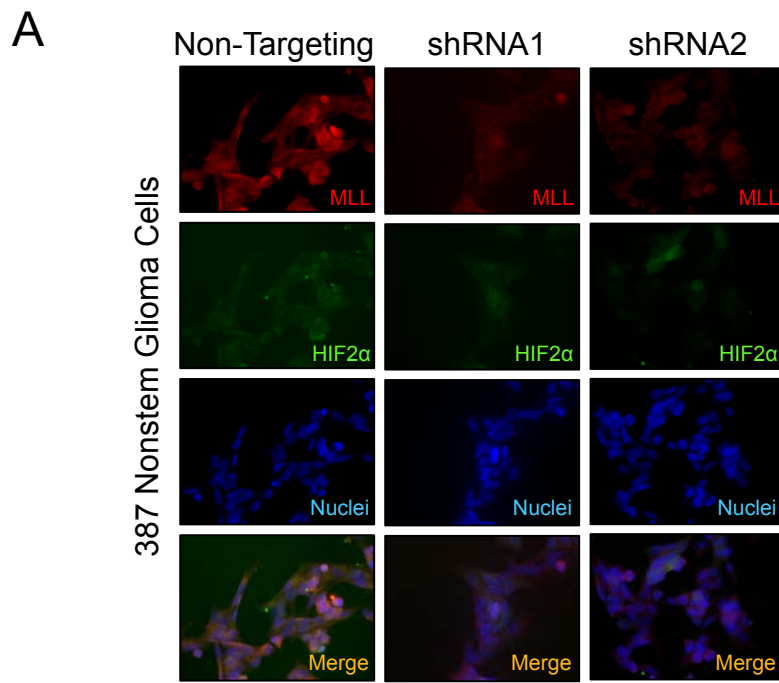

387 Non-Stem Glioma Cell

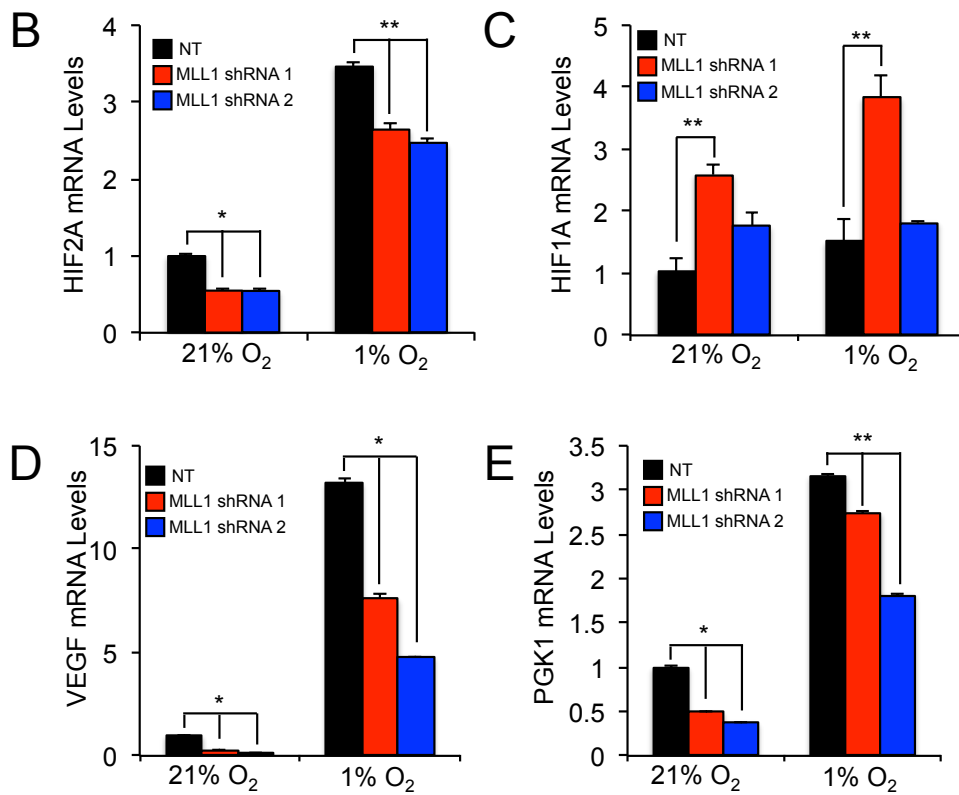

## Unfractionated 387 Glioma Cells

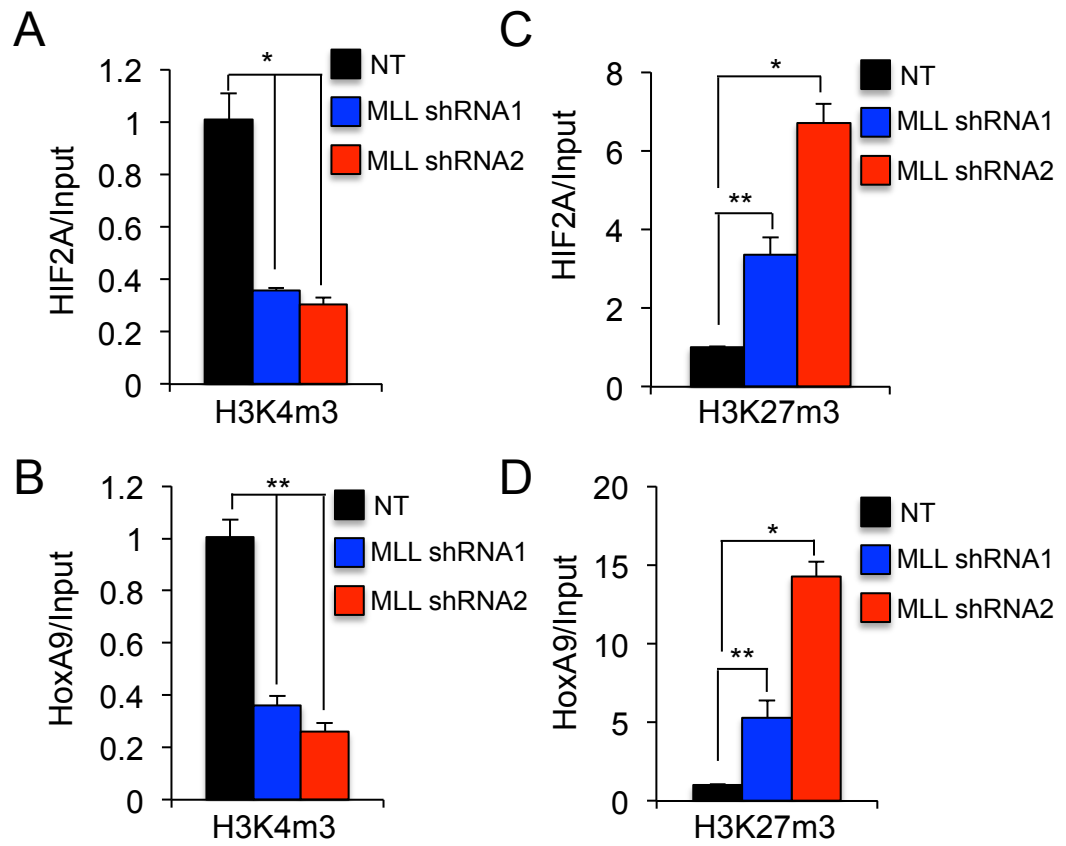

## A GSC Neurospheres

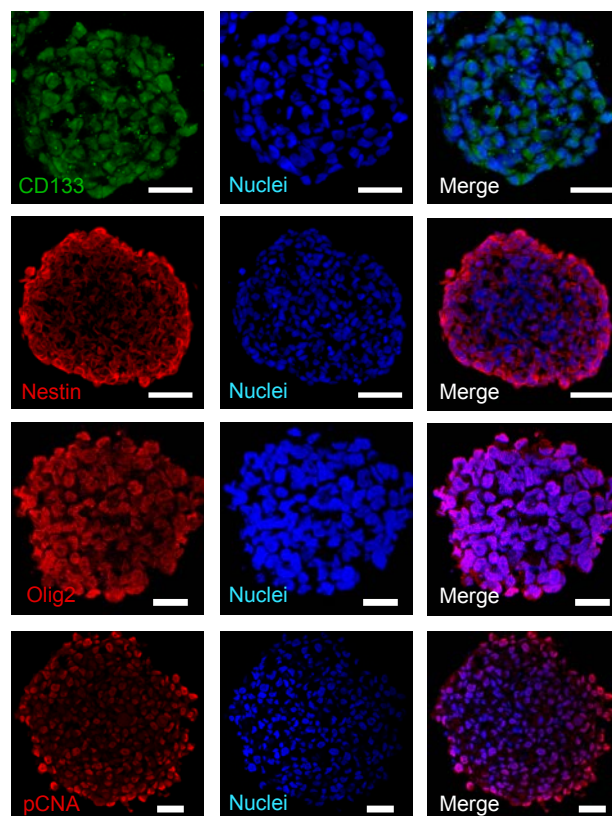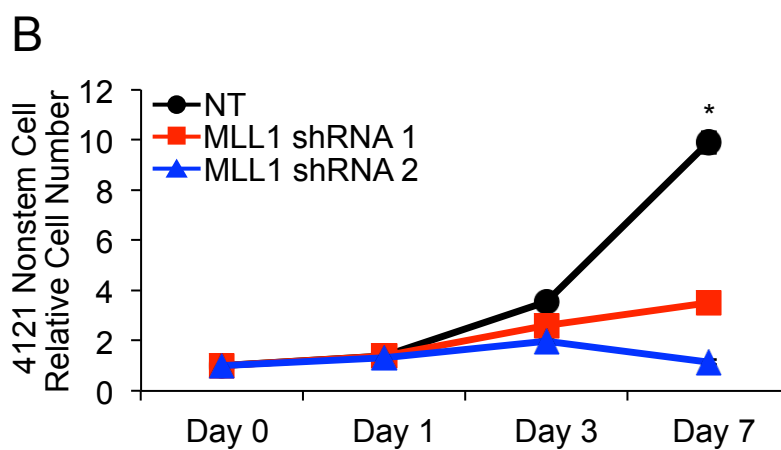

Supplement: NIHMS310886-supplement-1.pdf [file NIHMS310886-supplement-1.pdf]
